# Supplementary material
Source: PubMed Central journal article supplement (PMC8714854)
Supplement: mmc1.pdf [file mmc1.pdf]

**Cell Reports Medicine, Volume 2**

**Supplemental information**

**Secretory IgA and T cells targeting**

**SARS-CoV-2 spike protein are transferred**

**to the breastmilk upon mRNA vaccination**

**Juliana Gonçalves, A. Margarida Juliano, Nádia Charepe, Marta Alenquer, Diogo Athayde, Filipe Ferreira, Margarida Archer, Maria João Amorim, Fátima Serrano, and Helena Soares**

**Figure S1**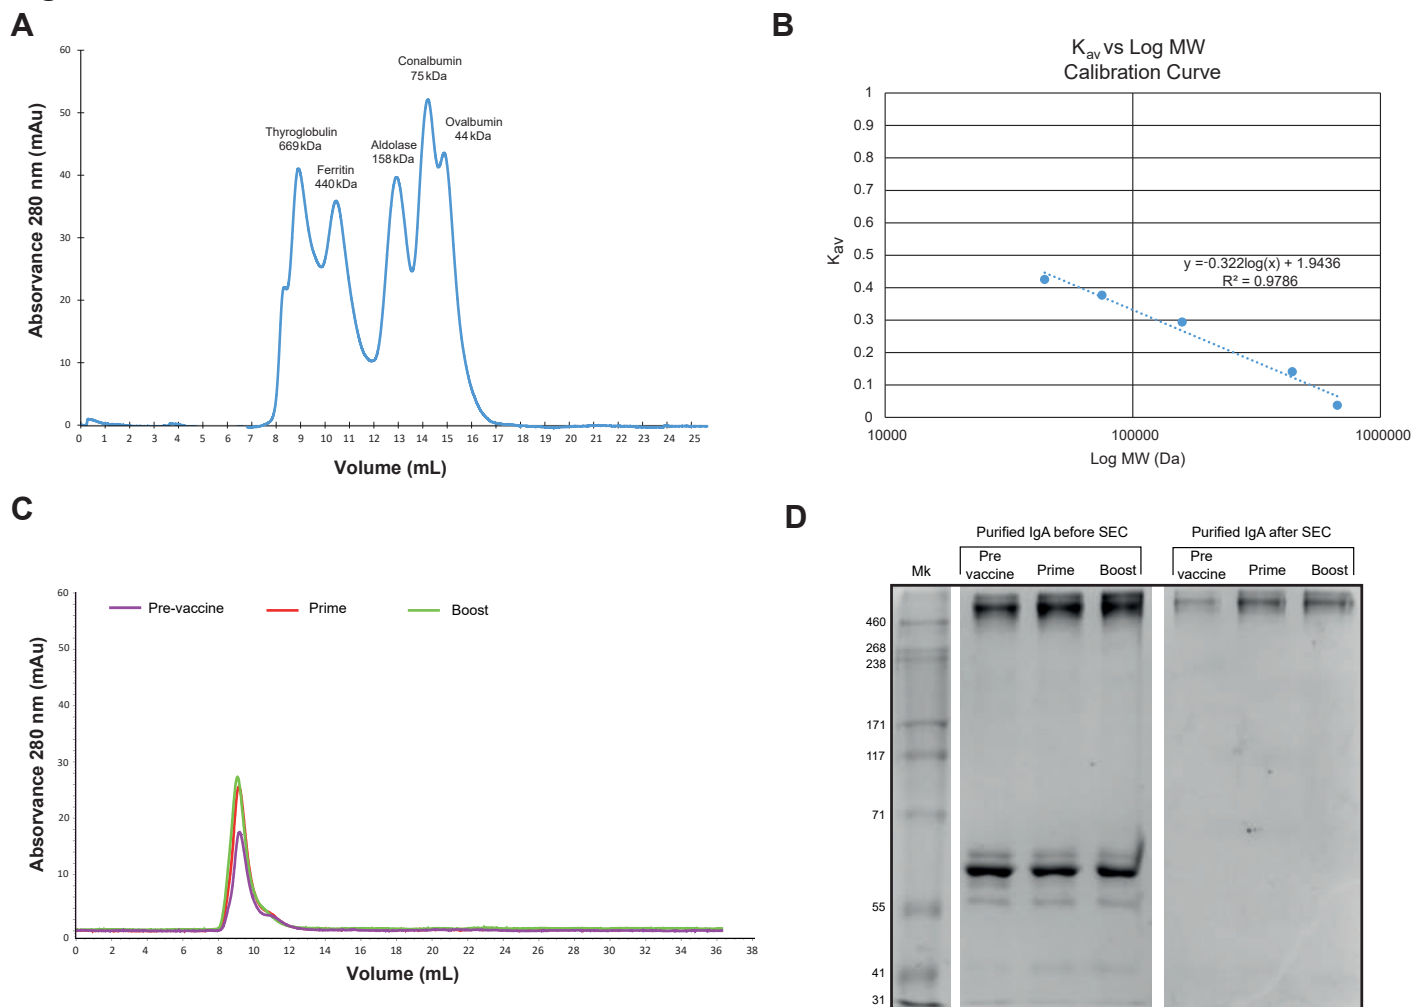

**Figure S1. Size exclusion chromatography (SEC) of IgA purified milk fractions.** Related to Figure 2. (A) Chromatogram of all standard proteins run in a Superdex 200 increase 10/300 GL. HWM Filtration Calibration Kit (Cytiva) were used with the following proteins: thyroglobulin (669 kDa); ferritin (450 kDa), aldolase (158 kDa), conalbumin (75 kDa) and ovalbumin (44 kDa). These standard proteins were dissolved in bi-distilled water and their chromatographic profiles were obtained using an UV detector. (B) Graphical representation of calibration curve of partition coefficient ( $K_{av}$ ) of each protein versus their respective molecular weight in Daltons. The  $K_{av}$  was calculated through the following formula:  $K_{av} = (V_e - V_0) / (V_c - V_0)$  where  $V_e$  is the elution volume of the protein,  $V_0$  is the void volume and  $V_c$  is the column bed volume. A dispersion graph  $K_{av}$  vs logMW was constructed. The equation obtained for the calibration curve is:  $K_{av} = -0.322\log(MW) + 1.9436$ , where  $K_{av}$  is the partition coefficient and MW is the protein molecular weight (Da). (C) Size exclusion chromatogram of skim milk purified IgA fraction collected pre-vaccine (purple), or after first (red) and second (green) vaccine doses. (D) Non-reducing polyacrylamide gel electrophoresis of purified IgA fractions before SEC and after SEC of milk samples collected pre-vaccine, or after first (prime) and second (boost) vaccine doses. For the sake of clarity we removed gel lines 2 and 5 which pertained to the paired blood sample.

**Table S1.** Demographic data of nursing women. Related to Figure 1.

| <b>Nursing</b> | <b>Age (years)</b> | <b>Feeding duration (months)</b> | <b>Days post 1<sup>st</sup> dose</b> | <b>Days post 2<sup>nd</sup> dose</b> | <b>Vaccine</b> | <b>COVID-19 diagnostic</b> |
|----------------|--------------------|----------------------------------|--------------------------------------|--------------------------------------|----------------|----------------------------|
| 1              | 31                 | 16                               | 10                                   | 10                                   | BNT162b2       | No                         |
| 2              | 44                 | 12                               | 10                                   | 11                                   | BNT162b2       | No                         |
| 3              | 34                 | 7                                | 8                                    | 7                                    | BNT162b2       | No                         |
| 4              | 37                 | 13                               | 13                                   | 13                                   | BNT162b2       | No                         |
| 5              | 39                 | 21                               | 13                                   | 10                                   | BNT162b2       | No                         |
| 6              | 31                 | 23                               | 8                                    | 10                                   | BNT162b2       | No                         |
| 7              | 33                 | 13                               | 8                                    | 8                                    | BNT162b2       | No                         |
| 8              | 35                 | 11                               | 16                                   | 9                                    | BNT162b2       | No                         |
| 9              | 38                 | 4                                | 10                                   | 10                                   | BNT162b2       | No                         |
| 10             | 28                 | 15                               | 12                                   | 12                                   | BNT162b2       | No                         |
| 11             | 33                 | 9                                | 9                                    | 7                                    | BNT162b2       | No                         |
| 12             | 38                 | 13                               | 8                                    | 9                                    | BNT162b2       | No                         |
| 13             | 31                 | 3                                | 8                                    | 9                                    | BNT162b2       | No                         |
| 14             | 29                 | 13                               | 7                                    | 10                                   | BNT162b2       | No                         |
| 15             | 30                 | 6                                | 12                                   | 12                                   | BNT162b2       | No                         |
| 16             | 32                 | 5                                | 15                                   | 26                                   | BNT162b2       | No                         |
| 17             | 32                 | 4                                | 11                                   | 21                                   | BNT162b2       | No                         |
| 18             | 40                 | 4                                | 10                                   | 9                                    | BNT162b2       | No                         |
| 19             | 30                 | 4                                | 15                                   | 15                                   | mRNA-1273      | No                         |
| 20             | 31                 | 4                                | 11                                   | 25                                   | BNT162b2       | No                         |
| 21             | 26                 | 6                                | 10                                   | 10                                   | mRNA-1273      | No                         |
| 22             | 29                 | 14                               | 11                                   | 11                                   | BNT162b2       | No                         |
| 23             | 23                 | 9                                | 10                                   | 10                                   | BNT162b2       | No                         |
| 24*            | 30                 |                                  |                                      |                                      |                |                            |
| 25*            | 28                 |                                  |                                      |                                      |                |                            |
| 26*            | 27                 |                                  |                                      |                                      |                |                            |

\*Only pre-vaccination samples were provided and used to calculate milk Ig cut-offs.

**Table S2.** Demographic data of controls. Related to Figure 1.

| <b>Controls</b> | <b>Age (years)</b> | <b>Days post 2<sup>nd</sup> dose</b> | <b>Vaccine</b> | <b>COVID-19 diagnostic</b> |
|-----------------|--------------------|--------------------------------------|----------------|----------------------------|
| 1               | 26                 | 10                                   | BNT162b2       | No                         |
| 2               | 34                 | 16                                   | BNT162b2       | No                         |
| 3               | 26                 | 10                                   | BNT162b2       | No                         |
| 4               | 28                 | 10                                   | BNT162b2       | No                         |
| 5               | 40                 | 10                                   | BNT162b2       | No                         |
| 6               | 31                 | 10                                   | BNT162b2       | No                         |
| 7               | 30                 | 10                                   | BNT162b2       | No                         |
| 8               | 34                 | 11                                   | BNT162b2       | No                         |
| 9               | 36                 | 11                                   | BNT162b2       | No                         |
| 10*             | 62                 | 11                                   | BNT162b2       | No                         |
| 11              | 31                 | 16                                   | BNT162b2       | No                         |
| 12              | 31                 | 18                                   | BNT162b2       | No                         |
| 13              | 32                 | 18                                   | BNT162b2       | No                         |
| 14              | 31                 | 21                                   | BNT162b2       | No                         |
| 15              | 37                 | 20                                   | BNT162b2       | No                         |
| 16              | 39                 | 11                                   | BNT162b2       | No                         |
| 17              | 36                 | 13                                   | BNT162b2       | No                         |
| 18              | 43                 | 9                                    | BNT162b2       | No                         |
| 19              | 40                 | 12                                   | BNT162b2       | No                         |
| 20              | 23                 | 21                                   | mRNA-1273      | No                         |
| 21              | 25                 | 12                                   | mRNA-1273      | No                         |
| 22              | 43                 | 22                                   | BNT162b2       | No                         |
| 23              | 41                 | 12                                   | BNT162b2       | No                         |

\*Excluded from the study due to post-menopausal status.

**Table S3.** OD<sub>450</sub> for spike-reactive SIgA, IgA, IgG in breastmilk, and NT50 for purified milk IgA, after vaccine second dose. Related to Figure 2.

| <b>Nursing</b> | <b>OD<sub>450</sub> anti-Spike SIgA</b> | <b>OD<sub>450</sub> anti-Spike IgA</b> | <b>OD<sub>450</sub> anti-Spike IgG</b> | <b>NT50 purified IgA</b> |
|----------------|-----------------------------------------|----------------------------------------|----------------------------------------|--------------------------|
| 1              | 0.491                                   | 1.39                                   | 1.156                                  | n.d.                     |
| 2              | 0.249                                   | 0.899                                  | 0.988                                  | n.d.                     |
| 3              | 0.097                                   | 0.806                                  | 0.923                                  | n.d.                     |
| 4              | 0.216                                   | 1.092                                  | 0.992                                  | n.d.                     |
| 5              | 0.353                                   | 1.427                                  | 0.961                                  | n.d.                     |
| 6              | 0.159                                   | 0.853                                  | 1.088                                  | n.d.                     |
| 7              | 0.226                                   | 1.174                                  | 1.042                                  | n.d.                     |
| 8*             | 1.052                                   | 1.6                                    | 1.032                                  | -                        |
| 9              | 0.424                                   | 1.476                                  | 0.957                                  | 7.45 (4.29-9.57)         |
| 10             | 0.085                                   | 0.726                                  | 0.973                                  | n.d.                     |
| 11             | 0.269                                   | 1.258                                  | 1.174                                  | n.d.                     |
| 12             | 0.204                                   | 1.099                                  | 1.057                                  | n.d.                     |
| 13             | 0.137                                   | 0.746                                  | 0.963                                  | n.d.                     |
| 14             | 0.266                                   | 0.975                                  | 1.043                                  | n.d.                     |
| 15             | 0.102                                   | 0.145                                  | 0.86                                   | n.d.                     |
| 16             | 0.062                                   | 0.087                                  | 0.763                                  | n.d.                     |
| 17             | 0.205                                   | 0.313                                  | 1.037                                  | n.d.                     |
| 18             | 0.167                                   | 0.796                                  | 0.869                                  | n.d.                     |
| 19             | 0.834                                   | 1.339                                  | 0.945                                  | 2.15 (0.14-6.47)         |
| 20             | 0.301                                   | 0.831                                  | 0.484                                  | n.d.                     |
| 21             | 0.665                                   | 1.359                                  | 0.881                                  | 9.15 (4.22-39.97)        |
| 22             | 0.109                                   | 1.012                                  | 0.615                                  | n.d.                     |
| 23             | 0.133                                   | 0.627                                  | 1.191                                  | n.d.                     |

\*This sample could not be used to purify milk IgA due to insufficient volume.
